# Supplementary material for: Cigarette Smoking, Incident Coronary Heart Disease, and Coronary Artery Calcification in Black Adults: The Jackson Heart Study
Source: PubMed Central journal article supplement — J Am Heart Assoc. 2021 Mar 23;10(7):e017320. doi: 10.1161/JAHA.120.017320 (PMC8174312; doi:10.1161/jaha.120.017320), 2021-03-23

# **SUPPLEMENTAL MATERIAL**

**Table S1. CHD incidence by smoking status and intensity From Visit 1 to 2016 stratified by sex.**

|                                                                | <b>Never Smokers</b> | <b>Former Smokers</b> | <b>Current Smokers</b> | <b>Current (1-19 cigarettes per day)</b> | <b>Current (<math>\geq 20</math> cigarettes per day)</b> |
|----------------------------------------------------------------|----------------------|-----------------------|------------------------|------------------------------------------|----------------------------------------------------------|
| Crude CHD incidence (per 1000 person-years) for <i>Males</i>   | 4.4                  | 7.8                   | 5.0                    | 5.8                                      | 3.8                                                      |
| Crude CHD incidence (per 1000 person-years) for <i>Females</i> | 3.3                  | 6.2                   | 6.3                    | 6.4                                      | 5.8                                                      |

**Table S2. Association between smoking status and incident CHD From Visit 1 to 2016 (Propensity adjusted analysis).**

|              | Smoking Status               |                                            | Smoking Intensity                            |                                                    |
|--------------|------------------------------|--------------------------------------------|----------------------------------------------|----------------------------------------------------|
|              | Former vs Never Smokers      | Current vs Never Smokers                   | Current (1-19 Cigarettes/D) vs Never Smokers | Current ( $\geq 20$ Cigarettes/D) vs Never Smokers |
| <b>Model</b> | 1.30, p=0.107<br>(0.95,1.79) | <b>1.71, p=0.001</b><br><b>(1.14,2.56)</b> | <b>1.93, p=0.004</b><br><b>(1.24,3.00)</b>   | 1.19, p=0.649<br>(0.57,2.47)                       |

Values are given as HR P Value (95% CI). CI indicates confidence interval; HR, Hazard ratio; P- values in bold are significant; Model : adjusted for age, sex, education level, diabetes, systolic blood pressure, body mass index, hypertension, total cholesterol, fasting triglycerides, physical activity and alcohol intake in the past 12 months.

\*n= 2874 for Never smokers; n= 723 for Former smokers; n= 329 for Current smokers; n= 329 for Current smokers using 1-19 cigarettes/day; n= 154 for Current smokers using  $\geq 20$  cigarettes/day

**Table S3. Association between smoking status and incident CHD From Visit 1 to 2016 (modified poisson regression).**

|              | Smoking Status                |                                            | Smoking Intensity                            |                                                    |
|--------------|-------------------------------|--------------------------------------------|----------------------------------------------|----------------------------------------------------|
|              | Former vs Never Smokers       | Current vs Never Smokers                   | Current (1-19 Cigarettes/D) vs Never Smokers | Current ( $\geq 20$ Cigarettes/D) vs Never Smokers |
| <b>Model</b> | 1.22, p=0.283<br>(0.84, 1.79) | <b>1.96, p=0.009</b><br><b>(1.18,3.25)</b> | <b>1.87, p=0.027</b><br><b>(1.07, 3.26)</b>  | 1.40, p=0.449<br>(0.59, 3.34)                      |

Values are given as RR P Value (95% CI). CI indicates confidence interval; RR, RR, Risk ratio; P- values in bold are significant; Model : adjusted for age, sex, education level, diabetes, systolic blood pressure, body mass index, hypertension, total cholesterol, fasting triglycerides, physical activity and alcohol intake in the past 12 months.

\*n= 2874 for Never smokers; n= 723 for Former smokers; n= 329 for Current smokers; n= 329 for Current smokers using 1-19 cigarettes/day; n= 154 for Current smokers using  $\geq 20$  cigarettes/day

**Table S4. Distribution of CAC scores at Visit 2 among JHS Participants by smoking Status.**

|                                        | <b>Never Smoker</b> | <b>Former Smoker</b> | <b>Current Smoker</b> |
|----------------------------------------|---------------------|----------------------|-----------------------|
| <b>Mean</b>                            | 102.56              | 210.55               | 203.87                |
| <b>75<sup>th</sup> percentile (Q3)</b> | 37.58               | 143.31               | 114.09                |
| <b>Median</b>                          | 0.00                | 7.01                 | 11.68                 |
| <b>25<sup>th</sup> percentile (Q1)</b> | 0.00                | 0.00                 | 0.00                  |
| <b>Mode</b>                            | 0.00                | 0.00                 | 0.00                  |
| <b>Standard Deviation</b>              | 355.51              | 542.45               | 526.81                |
| <b>Range</b>                           | 7877                | 5139                 | 3842                  |
| <b>Interquartile Range (IQR)</b>       | 37.59               | 143.30               | 114.09                |
| <b>Maximum</b>                         | 7877.13             | 5138.75              | 3842.38               |

n= 2493 for total number of participants with CAC scores after exclusion of participants with missing covariates

**Table S5. Association between smoking status and CAC (Log Transformed) at Visit 2.**

|                | <b>Never Smokers</b> | <b>Former Smokers</b>                           | <b>Current Smokers</b>                          | <b>Current (1-19 Cigarettes/D)</b>              | <b>Current (<math>\geq 20</math> Cigarettes/D)</b> |
|----------------|----------------------|-------------------------------------------------|-------------------------------------------------|-------------------------------------------------|----------------------------------------------------|
| <b>Model 1</b> | 0 (ref)              | <b>0.32, p&lt;0.0001</b><br><b>(0.22, 0.43)</b> | <b>0.93, p&lt;0.0001</b><br><b>(0.79, 1.06)</b> | <b>0.73, p&lt;0.0001</b><br><b>(0.57, 0.89)</b> | <b>1.25, p&lt;0.0001</b><br><b>(0.11, 1.03)</b>    |
| <b>Model 2</b> | 0 (ref)              | <b>0.21, p&lt;0.001</b><br><b>(0.10, 0.32)</b>  | <b>0.84, p&lt;0.0001</b><br><b>(0.69, 0.99)</b> | <b>0.58, p&lt;0.0001</b><br><b>(0.40, 0.75)</b> | <b>1.34, p&lt;0.0001</b><br><b>(1.10, 1.59)</b>    |

Multivariable linear regression model for participants by smoking status and intensity with CAC scores

n= 2493; Values are given as  $\beta$  coefficients, P Value (95% CI). CI indicates confidence interval; P- values in bold are significant; Model 1: adjusted for age and sex; Model 2: Model 1 plus education level, diabetes, systolic blood pressure, body mass index, hypertension, total cholesterol, fasting triglycerides, physical activity, and alcohol intake in the past 12 months

**Figure S1. Distribution of non-transformed CAC scores at Visit 2 among JHS Participants by smoking Status.**

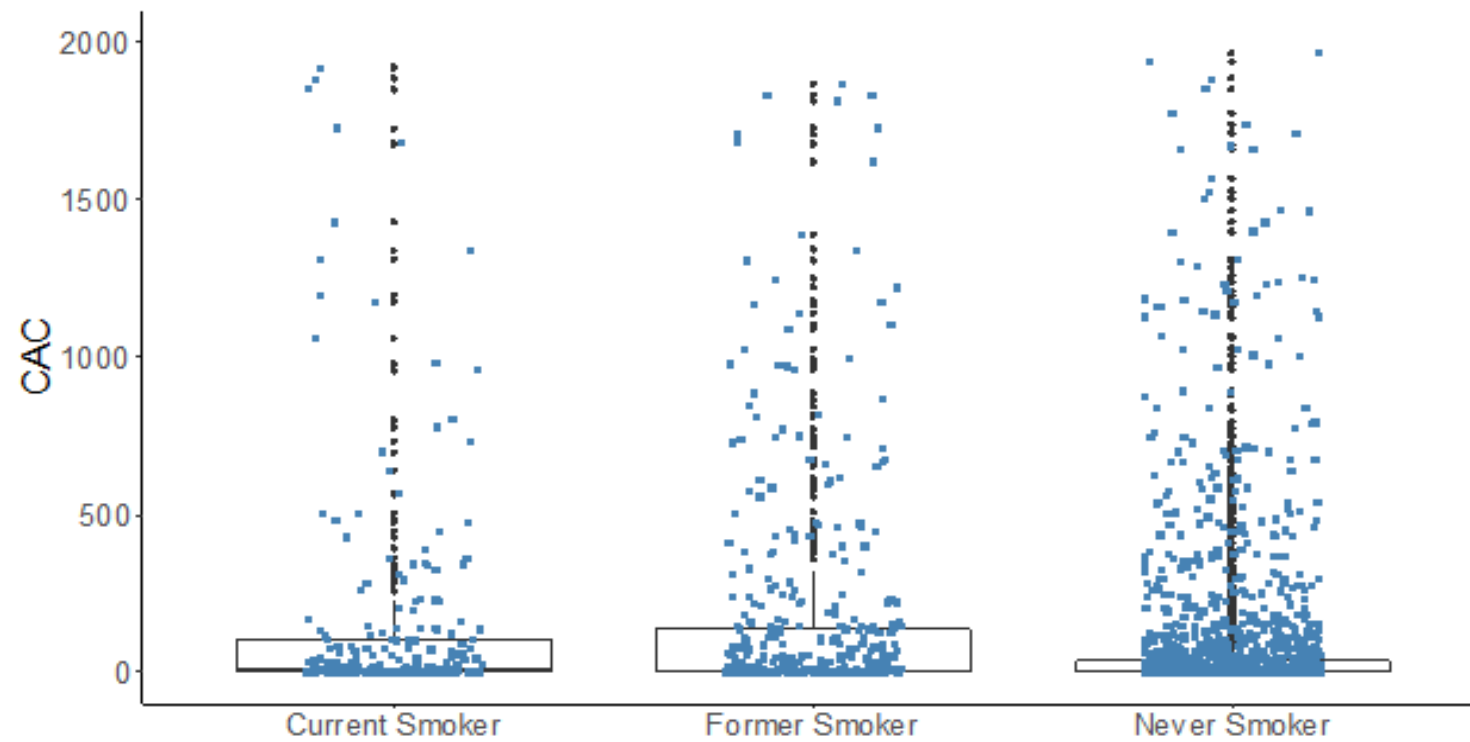

Supplement: JAH3-10-e017320-s001.pdf [file JAH3-10-e017320-s001.pdf]
